1 **Guiding biomolecular interactions in cells using *de novo* protein-protein interfaces**

2  
3 Abigail J. Smith,<sup>1,2</sup> Franziska Thomas<sup>2,†</sup>, Deborah Shoemark<sup>1,2</sup>, Derek N. Woolfson<sup>1,2,3,\*</sup> &  
4 Nigel J. Savery<sup>1,2,\*</sup>

5  
6 <sup>1</sup>School of Biochemistry, University of Bristol, Medical Sciences Building, University Walk,  
7 Bristol BS8 1TD, UK

8 <sup>2</sup>BrisSynBio, University of Bristol, Life Sciences Building, Tyndall Avenue, Bristol BS8  
9 1TQ, UK

10 <sup>3</sup>School of Chemistry, University of Bristol, Cantock's Close, Bristol BS8 1TS, UK

11  
12 † Current address: Institute of Organic and Biomolecular Chemistry, Georg-August-  
13 Universität Göttingen, Tammannstr. 2, 37077 Göttingen, Germany

14 \*To whom correspondence should be addressed: N.J.Savery@bristol.ac.uk;  
15 D.N.Woolfson@bristol.ac.uk

16  
17 **KEYWORDS:**  $\alpha$ -helical coiled coil; *de novo* protein design; DNA-protein interaction;  
18 protein-protein interaction; TAL effectors; transcriptional control.

19  
20 **AUTHOR CONTRIBUTIONS:** AJS, DNW and NJS designed the study, interpreted results  
21 and wrote the paper. AJS conducted all experimental work. FT designed sequences for the  
22 expression of CC peptides. DS designed linkers for fusion of CC peptides to other proteins. All  
23 authors commented on the final draft of the paper.

25 **ABSTRACT:**

26 An improved ability to direct and control biomolecular interactions in living cells would impact  
27 on synthetic biology. A key issue is the need to introduce interacting components that act  
28 orthogonally to endogenous proteomes and interactomes. Here we show that low-complexity,  
29 *de novo* designed protein-protein-interaction (PPI) domains can substitute for natural PPIs and  
30 guide engineered protein-DNA interactions in *Escherichia coli*. Specifically, we use *de novo*  
31 homo- and hetero-dimeric coiled coils to reconstitute a cytoplasmic split adenylate cyclase; to  
32 recruit RNA polymerase to a promoter and activate gene expression; and to oligomerize both  
33 natural and designed DNA-binding domains to repress transcription. Moreover, the stabilities  
34 of the heterodimeric coiled coils can be modulated by rational design and, thus, adjust the levels  
35 of gene activation and repression *in vivo*. These experiments demonstrate the possibilities for  
36 using designed proteins and interactions to control biomolecular systems such as enzyme  
37 cascades and circuits in cells.

38

## 39 INTRODUCTION

40 The advent of synthetic biology has brought an increased demand for protein components of  
41 reduced size and complexity, which are orthogonal to cellular systems and that function  
42 according to understood parameters. Protein-protein interactions (PPIs) are one aspect of  
43 protein function that is amenable to design and manipulation. Moreover, an ability to design  
44 PPIs completely *de novo* and predictably would impact broadly in synthetic biology by  
45 allowing biomolecular interactions and functions to be guided and orchestrated in cells with  
46 precision and, potentially, without interfering with endogenous proteomes and interactomes.  
47 Whilst excellent progress has been made on the *de novo* design and assembly of PPI-mediated  
48 macromolecular structures *in vitro*,<sup>1-4</sup> much less has been done in living cells. Success here  
49 would allow the targeting of proteins to prescribed cellular regions, the co-localization of  
50 enzymes to optimize bioproduction, the reconstitution of split proteins to switch enzyme  
51 activity on and off, and the assembly of completely new structures in cells to act as scaffolds  
52 or compartments for such processes.<sup>5-8</sup> An advantage of targeting PPIs to take control in  
53 synthetic biology is that the PPI components are usually separable from the downstream  
54 activity, and so designed PPIs will find applications across many different systems.

55 An important example of PPIs in cells is transcription control, where PPI-mediated  
56 recruitment of components underlies most forms of gene activation.<sup>9</sup> Transcription repression  
57 is also often underpinned by PPIs, either by recruitment of corepressors or because the  
58 multimerization of the repressor proteins is a prerequisite for DNA binding.<sup>10,11</sup> Indeed, in cell  
59 and synthetic biology, transcription regulation has provided proof-of-concept systems in which  
60 to monitor and exploit PPIs within cells.<sup>12-15</sup> In their simplest forms, transcription activators  
61 consist of a DNA-binding domain, which defines the promoter-specificity of its action, and a  
62 PPI domain that recruits RNA polymerase (RNAP) or an associated factor.<sup>14</sup> Bacterial  
63 repressor proteins are conceptually even simpler, as an isolated DNA-binding domain can  
64 repress transcription by sterically blocking RNAP binding. However, most natural bacterial  
65 repressor proteins exist as PPI-dependent multimers. The cooperative binding that results from  
66 multimerization can be important for the design and function of Gene Regulatory Networks  
67 (GRNs).<sup>16</sup> For both activators and repressors, the affinity of the PPI and of the protein-DNA  
68 interaction are key parameters that define the behavior of the components within such GRNs.

69 One of the best-understood PPI motifs is the  $\alpha$ -helical coiled coil (CC).<sup>17,18</sup> This  
70 understanding has led to considerable success in CC design.<sup>4,19,20</sup> CCs are abundant in nature  
71 and usually display heptad sequence repeats of hydrophobic (*h*) and polar (*p*) amino acids,

72 **hpphppp** (often denoted **abcdefg**). These repeating patterns direct the folding of amphipathic  
73  $\alpha$  helices, which assemble *via* their hydrophobic faces to form left-handed rope-like structures  
74 with two or more helices in parallel or antiparallel orientations.<sup>17,18</sup> The rules that govern  
75 assembly of CCs have been deciphered.<sup>19-21</sup> In turn, these have enabled the rational design of  
76 “toolkits” of CC peptides that assemble in homo- or hetero-multimeric complexes predictably  
77 *in vitro*.<sup>22-27</sup> In one such study from one of our laboratories, the hydrophobic amino acids at  
78 positions **a** and **d** have been varied to create a set of 30-residue peptides that form parallel  
79 homomeric dimers, trimers and tetramers, which have been characterized to atomic  
80 resolution.<sup>23</sup> These peptides are named CC-Di, CC-Tri and CC-Tet, respectively. A series of  
81 parallel heterodimeric CCs has also been designed, in which one set of peptides has acidic  
82 amino acids at the **e** and **g** positions and another complementary set has basic residues at the **e**  
83 and **g** sites.<sup>24</sup> These CC-Di-A and CC-Di-B peptides do not fold in isolation, but combine  
84 when mixed to form stable, obligate heterodimers. Moreover, as CC stability increases with  
85 increasing chain length, the CC-Di-AB heterodimers can be tuned to give a range of  
86 dissociation constants that varies over several orders of magnitudes *in vitro*.<sup>24</sup>

87 Natural and synthetic CCs have been shown to function effectively as PPIs within  
88 transcription activators in yeast and *E. coli*.<sup>25,28</sup> Here, we test the ability of the *de novo*  
89 designed homo and hetero-dimeric CC peptides to function as PPI domains in a range of  
90 contexts within living *E. coli* cells. We find that the CC peptides can mediate PPIs in multiple  
91 systems *in vivo*, including as part of a cytoplasmic split enzyme, and as components of both  
92 transcription repressors and transcription activators. In most cases, the binding affinity  
93 designed and measured *in vitro* is reflected in the strengths of the regulatory activity measured  
94 *in vivo*. The heterodimeric sequences show the expected specificity, with little or no self-  
95 association or off-target activity evident. To demonstrate the complete modular design of  
96 synthetic transcription factors, we combine the *de novo* CC-based PPIs with programmable  
97 DNA-binding domains based on TAL repeats to generate homo- and heterodimeric  
98 transcription regulators. Thus, in these artificial transcription factors, both PPI activity and  
99 DNA-binding activity can be designed to match the requirements of a desired application.

100

## 101 **RESULTS AND DISCUSSION**

102 **Protein Colocalization *In Vivo* by *De Novo* Designed PPIs.** First, we measured the ability  
103 of our toolkit of CC peptides to bring together the components of a split cytoplasmic enzyme.



104 In this system the adenylate cyclase protein of *Bordetella pertussis* is expressed as two separate  
105 domains (T25 and T18), which come together to form an active enzyme when fused to partner  
106 proteins that form a PPI.<sup>29</sup> This reconstitution produces cyclic AMP (cAMP), which is detected  
107 by monitoring the production of a *lacZ* reporter gene regulated by the cAMP receptor protein  
108 (CRP) (Figure 1a).

109 We tested two *de novo* CC PPIs: the homodimeric CC-Di<sup>23</sup> and the heterodimer CC-  
110 Di-AB system, in which complementary CC-Di-A and CC-Di-B peptides have been made with  
111 3-, 3.5- and 4- heptad repeats.<sup>24</sup> Plasmids encoding these CC peptides fused to the C termini  
112 of the components of split adenylate cyclase (*i.e.*, the T25 and T18 domains) were constructed  
113 using sequences codon-optimized for expression in *E. coli* (Figure 1b and Table S1).  
114 Reconstitution of adenylate cyclase was monitored in an *E. coli* strain DMH1.1, which lacks  
115 the native adenylate cyclase gene (*cyo*). T25 and T18 fusions were co-expressed, and  
116 expression of  $\beta$ -galactosidase from the cAMP-dependent *lacZ* gene was monitored by the  
117 production of a blue colony phenotype when the transformants were grown on rich X-gal  
118 indicator agar.

119 Cells expressing T25 and T18 without fusion partners did not produce detectable  $\beta$ -  
120 galactosidase (Figure 1c), and a positive control with these components fused to the yeast  
121 GCN4 leucine zipper produced cells with a blue phenotype. The leucine zipper could be  
122 substituted both by the CC-Di homodimer and by the CC-Di-AB pairs to give the blue  
123 phenotype indicative of adenylate cyclase reconstitution. Moreover, the heterodimers produced  
124 a graded effect on phenotype: a strong blue phenotype was observed in strain DHM1.1 when  
125 both peptide sequences were at least 3.5 heptads long and reduced or no coloration seen when  
126 either partner was just 3 heptads long. The experiments were repeated in another *cyo* strain,  
127 BTH101, which is reported to be more sensitive to weak interactions (Figure 1c). In this strain  
128 a positive interaction in cells expressing CC-Di-B<sup>3</sup> in conjunction with CC-Di-A<sup>3.5</sup> or CC-Di-  
129 A<sup>4</sup> was more evident, although the intensity of the blue phenotype was reduced in all cases  
130 compared to DHM1.1.

131 These results indicate that the homodimeric CC-Di and the heterodimeric CC-Di-AB  
132 pairs form PPIs within the cellular environment when expressed as fusions to a split  
133 cytoplasmic enzyme.

134 **Transcription activation *in vivo* by *de novo* designed PPIs.** The graded phenotype of the  
135 heterodimeric adenylate cyclase constructs suggests that the binding affinities designed and

136 measured *in vitro* are reflected in the strength of interaction *in vivo*. However, this adenylate  
137 cyclase assay is only semi-quantitative as it contains a positive feedback loop (expression of  
138 the fusion proteins is increased by the production of cAMP). To test the behavior of the CC-Di  
139 peptide sequences in a more quantitative system we next determined their ability to drive  
140 transcription activation in a bacterial 2-hybrid system.

141 Arbitrary PPIs can activate transcription via recruitment of RNA polymerase when one  
142 interacting partner is fused to a sequence-specific DNA binding domain (DBD) and the other  
143 is fused to RNA polymerase.<sup>14</sup> To test the *de novo* CCs as transcription-activating interfaces  
144 we used a bacterial 2-hybrid system comprising the  $\lambda$ cI repressor protein as the DBD and a  
145 truncated  $\alpha$  subunit of RNA polymerase as the target for recruitment (Figure 2a).<sup>30</sup> CC-Di,  
146 CC-Di-A or CC-Di-B sequences were fused to the C termini of the truncated  $\alpha$  subunit and the  
147 DBD. The ability of combinations of these constructs to activate transcription was monitored  
148 in a reporter strain carrying a *lacZ* reporter gene under the control of a synthetic promoter with  
149 an upstream  $\lambda$ cI binding site.

150 The homodimeric CC-Di fusions did not activate gene expression in this system  
151 (Supplementary Figure S1). This is not surprising as both  $\lambda$ cI and the  $\alpha$  subunits are themselves  
152 dimers, so we expect only *in cis* CC homodimerization and no *in trans* DBD-target interactions.  
153 By contrast, all the CC-Di-AB combinations activated transcription, regardless of which of the  
154 AB pairing was fused to the  $\alpha$  subunit and which was fused to the DBD (Figure 2 b and c).  
155 Activation depended on the presence of a cognate binding partner (Supplementary Figure S1),  
156 and in any given orientation the degree of activation increased with the length of the PPI for  
157 combinations of sequences containing 3 and 3.5 heptad repeats. Activation by CC-Di-AB  
158 combinations in which one or both partners contained a 4-heptad repeat showed less predictable  
159 levels of transcription activation. At present we cannot offer a clear explanation of this,  
160 although it may reflect competition between on-target heterodimerization and off-target  
161 homodimerization of these longer CCs in a manner similar to that seen with CC-Di. This  
162 unexpected complexity highlights the need for some empiricism in the use of these *de novo*  
163 designed systems. Nonetheless, it is clear that gene activation can be directed by these *de novo*  
164 designed heterodimeric PPIs *in vivo*.

165 **Transcription repression *in vivo* by *de novo* designed PPIs.** The *E. coli* Lac repressor (LacI)  
166 is a “dimer of dimers”, with the primary dimer interfaces between monomer surfaces and  
167 tetramerization mediated by C-terminal regions of each monomer, which form an antiparallel

168 four-helix CC bundle.<sup>31</sup> Dimerization enables the repressor to bind tightly to a palindromic  
169 operator sequence, and tetramerization enables simultaneous binding to a second, auxiliary  
170 operator.<sup>32</sup> The CC region can be replaced by the GCN4 leucine zipper, converting the  
171 tetrameric protein into an active dimer.<sup>31</sup> Similarly, we replaced the wild-type CC with our *de*  
172 *novo* designed CC dimers (Figure 3a). To maximize the reliance of dimerization on interaction  
173 of our CC sequences we used a C-terminally truncated LacI variant with a weakened monomer-  
174 monomer interface (LacI\*<sup>33</sup>).

175 The *de novo* CCs were fused *via* short linkers to the C terminus of LacI\*. Genes  
176 encoding full length LacI or the LacI\* proteins, with N-terminal His-tag and Xpress<sup>TM</sup> tags,  
177 were expressed under the control of the arabinose-inducible P<sub>BAD</sub> promoter. Activity of the  
178 resulting fusion proteins was tested in a *lacI* strain using a superfolder GFP reporter under the  
179 control of the *lacUV5* promoter, which carries a single *lac* operator sequence (Figure 3a). GFP  
180 expression was greatly reduced in cells expressing full length LacI protein, but only slightly  
181 reduced in cells expressing LacI\* (Figure 3b). GFP expression in cells expressing LacI\*-CC-  
182 Di was similar to that observed with full length LacI, indicating that CC-Di can substitute for  
183 the WT CC sequence to drive oligomerization of the repressor protein and consequent binding  
184 to DNA.

185 Next, we measured the effect of forming LacI\* heterodimers mediated by the tunable  
186 CC-Di-AB series. The LacI\*-CC-Di-A and LacI\*-CC-Di-B constructs were expressed from  
187 different plasmids, each under the control of the P<sub>BAD</sub> promoter. Co-expression of LacI\*  
188 proteins fused to CC-Di-A<sup>3.5</sup> and CC-Di-B<sup>3.5</sup> resulted in a level of repression that was  
189 intermediate between full-length LacI and LacI\* (Figure 3c). This effect requires a  
190 complementary partner sequence: neither LacI\*-CC-Di-A<sup>3.5</sup> or LacI\*-CC-Di-B<sup>3.5</sup> increased  
191 repression compared to LacI\* when expressed without its partner. Notably, the series of CC-  
192 Di-AB fusion proteins repressed expression of GFP in line with the affinities of the CC  
193 heterodimers measured *in vitro* (Figure 3d).<sup>24</sup> For example, cells expressing LacI\*-CC-Di-B<sup>3.5</sup>  
194 showed stronger repression when co-expressed with a fusion partner carrying a 3.5-heptad CC-  
195 Di-A sequence than they did when paired with a 3-heptad variant, and the level of repression  
196 increased further when the 4-heptad CC-Di-A sequence was used. The pattern of increased  
197 repression with increasing predicted strength of CC interaction was observed with all of the  
198 tested combinations, with the strongest repression being observed with the pairing of the two  
199 4-heptad repeat sequences.

200           These results confirm that the homodimeric CC-Di and the heterodimeric CC-Di-AB  
201 modules can function as PPIs to mediate the affinity of dimerization of transcriptional  
202 repressors *in vivo* in a predictable and tunable fashion.

203   **Oligomerisation of TAL-based repressors by *de novo* designed PPIs.** To create truly  
204 orthogonal synthetic transcription repressors it is desirable to couple designed PPIs with  
205 designable DBDs. CRISP-Cas9, Zn-fingers and TAL repeats have all been used to direct  
206 protein binding to specific sites on DNA within cells.<sup>34,35</sup> TAL effector proteins (TALEs)  
207 contain tandem arrays of  $\approx$ 34-residue TAL-repeat DBDs, each of which recognizes a single  
208 target base in DNA.<sup>36</sup> Site-specific DNA binding proteins can thus be built by assembling  
209 appropriate combinations of these TAL repeats. As a step towards creating wholly designed  
210 systems in which the specificity and affinity of both protein-protein and protein-DNA  
211 interactions can be specified, we combined our *de novo* CC-based PPIs with engineered TAL-  
212 based DBDs to create tunable homodimeric and heterodimeric transcription factors.

213           In their natural context the arrays of TAL repeats are flanked by *N*- and *C*-terminal  
214 regions that appear to be important for function in mammalian cells.<sup>37</sup> To identify the minimal  
215 TAL repeat scaffold that can serve as a DBD in our bacterial system, we designed a series of  
216 TAL-repeat proteins to bind to the *lacOI* operator sequence; namely, (I) a full-length TALE  
217 protein with intact *N*- and *C*-terminal regions, and truncated proteins lacking (II) the *N*-terminal  
218 region, (III) the *C*-terminal region, or (IV) both. These were expressed from the P<sub>BAD</sub> promoter,  
219 and their ability to bind DNA *in vivo* was assessed with a GFP reporter gene expressed from  
220 the *lacUV5* promoter carrying a single copy of *lacOI* (Figure 4). Construct I repressed the  
221 reporter gene efficiently at basal and induced levels of expression. Construct IV produced no  
222 repression at any level of expression tested. Construct II showed substantially impaired  
223 repression, although some function was retained. In contrast, although construct III was less  
224 effective than the full-length protein it did repress transcription effectively when its expression  
225 was induced.

226           As the *C*-terminal region of the TALE protein is not essential for DNA binding function  
227 in bacteria, we fused the homodimeric CC-Di peptide sequence *via* a short linker to the *C*  
228 terminus of a 17-repeat TAL array that was designed to bind to the *lacOI* sequence and that  
229 retained the native *N*-terminal region (TALX). Dimeric TALE-based proteins can loop DNA,  
230 enhancing the efficiency of repression.<sup>12</sup> Therefore, we tested the ability of this construct to  
231 repress transcription from *lacUV5* promoters carrying either one or two *lacOI* sequences. Each

232 contained a “primary operator” that overlapped the transcription start site, and the second  
233 operator, when present, was placed 92 bp upstream of the primary operator (Figure 5a). Control  
234 experiments with wild-type tetrameric LacI confirmed that the presence of the auxiliary  
235 upstream *lacO1* promoter enhanced repression in our system (Figure 5b). TALX lacking CC-  
236 Di repressed transcription from the single and dual operator promoters equally, but repression  
237 by TALX-CC-Di was enhanced by the presence of the upstream operator. This enhancement  
238 was abolished when the sequence of the upstream operator was changed from that of *lacO1* to  
239 the related but distinct sequence, *lacO3*. These results suggest that TALX-CC-Di forms a dimer  
240 *in vivo* that, by looping DNA, can bind cooperatively to two specified DNA sites.

241 Heterodimerization of TAL constructs should allow looping between two different  
242 DNA sequences, and also offer the possibility of integrating multiple regulatory signals to  
243 control the expression of each partner. To test this, we combined TAL constructs with the CC-  
244 Di-AB heterodimerization system. We designed a second 16 repeat TAL array, which retained  
245 the native *N*-terminal region and bound a target site that was not recognized by TALX (TALY)  
246 (Supplementary Figure 2). We fused CC-Di-B<sup>4</sup> *via* a short linker to the *C* terminus of TALX  
247 and CC-Di-A<sup>4</sup> *via* a short linker to the *C* terminus of TALY. Then, we tested the effect of  
248 combinations of constructs on expression from *lacUV5* promoters carrying the TALY binding  
249 site as a primary operator and *lacO1* or *lacO3* as the secondary operator (Figure 6). Co-  
250 expression of TALY-CC-Di-A<sup>4</sup> and TALX-CC-Di-B<sup>4</sup> enhanced repression when the auxiliary  
251 operator was *lacO1*. This enhancement was lost when the upstream site was mutated to *lacO3*,  
252 or when the PPI was abolished by omission of the CC-Di-A/B peptide from TALX or TALY.

253 These results indicate that combining TAL repeat sequences with *de novo* designed  
254 PPIs allows the design of proteins with desired protein-DNA and protein-protein interaction  
255 specificity that function within living cells.

256 **Conclusion.** The ability to direct and control the assembly of macromolecular complexes in  
257 cells is a key aim of synthetic biology. For instance, building networks of interacting  
258 components could allow engineered cells to colocalize or to segregate cellular processes, and  
259 to respond to their environment in complex but predictable ways. Herein, we show that  
260 straightforward *de novo* designed protein-protein interactions (PPIs) can substitute for natural  
261 PPIs to complement fragments of enzymes and to control transcriptional processes in bacterial  
262 cells. In addition, by combining these *de novo* PPIs with engineered DNA-binding repeats, we  
263 generate completely new transcriptional repressors. Moreover, because of the designability of

264 the *de novo* PPIs, the degree of downstream activity can be tuned. These *de novo* and  
265 engineered modules expand the repertoire of components for synthetic biology and protein  
266 design in the cell.

267 The construction of Gene Regulatory Networks (GRNs) is one area where multiple  
268 orthogonal and tuneable PPIs of the type we describe are needed. In this field, transcription  
269 repressors and activators, together with their DNA targets, are organized in topologies that  
270 enable cells to undertake computational tasks and actuate appropriate responses.<sup>38,39</sup> Some of  
271 the most complex GRNs have been built in *E. coli*, where a wide range of well-characterized  
272 native components is available. However, as the complexity of the networks increases the use  
273 of endogenous regulatory components becomes limiting. Many of the existing GRN sub-  
274 systems reuse the same small set of transcription factors, such as the LacI and TetR  
275 repressors.<sup>40,41</sup> Therefore, they cannot be combined readily as cross-talk between different parts  
276 of the network is inevitable. The range of characterized components available for use in GRNs  
277 can be increased either by co-opting regulatory components from other organisms, or by  
278 creating novel components. An example of the first approach is a library of mutually orthogonal  
279 repressors composed of TetR proteins from diverse prokaryotic species.<sup>42</sup> New components  
280 can also be created by modifying existing natural systems to modify their properties and make  
281 them orthogonal; for example, mutation of the bacteriophage T7 RNA polymerase has been  
282 used to generate a library of orthogonal RNA polymerases that recognise different promoter  
283 sequences.<sup>43</sup> In addition, transcription regulators represent an attractive target for *de novo*  
284 protein design, which was part of the motivation for the work presented herein.

285 Here we show that *de novo* CC-based PPIs designed from first principles can mediate  
286 the function of both transcription activators and repressors. Furthermore, these *de novo* PPIs  
287 can be combined with engineered TAL DNA-binding repeats to produce transcription  
288 repressors in which the affinity and specificity of both protein-protein and protein-DNA  
289 interactions are specified. This offers possibilities for creating components with specificities  
290 and affinities that are optimized on the basis of the mathematical model of a desired GRN,  
291 avoiding the limitations of natural components that have evolved for other purposes.

292 We have explored the function of a toolkit of designed homo- and heterodimeric CCs  
293 in four different molecular contexts in *E. coli* cells. We find that in most cases the CC behavior  
294 mirrors that seen *in vitro*. Some of the peptide sequences tested here have been shown recently  
295 to assemble in *E. coli* in other contexts: the heterodimeric CC drives the assembly of a novel



296 cytoscaffold and the subcellular localization of active enzymes when fused to shell proteins of  
297 a bacterial microcompartment;<sup>6,7</sup> and, while the work presented here was in preparation, the  
298 same heterodimeric CCs have been shown by others to recruit T7 RNA polymerase to Zn-  
299 finger DNA-binding domains.<sup>28</sup> Some adverse context-dependent effects have been noted: in  
300 our activation experiments proximity effects may inhibit heterodimerization; and in the  
301 programmable T7 RNA polymerase system the hierarchy of CC interaction strength varies with  
302 the nature of the Zn-finger domains to which the peptides are fused.<sup>28</sup> Thus, it is likely that  
303 improved rules or methods for designing linker sequences will be needed to help minimize  
304 such effects in future applications. We are working on this challenge using the ISAMBARD  
305 suite for computational protein design.<sup>44,45</sup> Nonetheless, our results, together with those of  
306 others,<sup>26,28</sup> indicate that the rules used to design our peptide sequences are sufficiently  
307 comprehensive to allow the CC components of the sequences to interact as designed in a  
308 cellular environment. Although we have yet to probe these systems with proteomics, it appears  
309 that the introduced biomolecular interactions operate orthogonally to the endogenous *E. coli*  
310 proteome and interactome. This work provides a starting point for the design and  
311 implementation of more-complex higher-order PPIs and possibly regulatable PPIs for control  
312 of protein assembly within cells.

313

## 314 MATERIALS AND METHODS

315 **Plasmids.** Full details of the construction of the plasmids used in this work are given in the  
316 supplementary information. Briefly: Adenylate cyclase reconstitution assays used derivatives  
317 of plasmid pKT25 (*kan<sup>R</sup>*), which encode fusions to the T25 fragment of *Bordetella pertussis*  
318 adenylate cyclase (CyaA) (amino acids 1-224) and of plasmid pUT18c (*amp<sup>R</sup>*), which encode  
319 fusions to the T18 fragment of CyaA (amino acids 225-399).<sup>46,47</sup> Transcription activation  
320 assays used derivatives of pRA02 (*amp<sup>R</sup>*), which encodes fusions with the  $\alpha$ -subunit of RNA  
321 polymerase (amino acids 1-248), and of pRA03 (*cm<sup>R</sup>*) which encodes fusions with the  $\lambda$ cI  
322 protein (amino acids 1-236)<sup>48</sup>. Lac repressor protein fusions were expressed from derivatives  
323 of plasmid pBADLacI\* (*amp<sup>R</sup>*) or pVRcLacI\* (*cm<sup>R</sup>*) which encode a C-terminally truncated  
324 Lac repressor (amino acids 1-331) containing an L251A substitution, under the control of the  
325 arabinose inducible *araBAD* promoter. Fusions to TAL repeats were expressed from plasmids  
326 derived from pVRc20\_992 (*cm<sup>R</sup>*, a gift from Christopher Voigt, Addgene #49739<sup>49</sup>) or  
327 pBADHis-B-iRFP (a gift from Vladislav Verkhusha, Addgene plasmid #31855<sup>50</sup>), under the

328 control of the arabinose inducible *araBAD* promoter. The reporter plasmid pVRbLacUV5  
329 (*kan<sup>R</sup>*) and derivatives allow the expression of sfGFP from the *lacUV5* promoter and is derived  
330 from the plasmid pVRb20\_992 (*kan<sup>R</sup>*, a gift from Christopher Voigt, Addgene plasmid  
331 #49714<sup>49</sup>).

332 **Bacterial two-hybrid assay utilizing adenylate cyclase reconstitution.** The bacterial two-  
333 hybrid assay based on adenylate cyclase reconstitution described in this work is essentially that  
334 described by Battesti and Bouveret.<sup>46</sup> *cyd*- DHM1.1 or BTH101 cells<sup>46</sup> were transformed with  
335 both pUT18c and pKT25 derived plasmids containing the adenylate cyclase subdomains T18  
336 or T25 fused to different CC peptides. Cells were grown at 30°C on LB agar supplemented  
337 with 100 µg/ml ampicillin and 50 µg/ml kanamycin. Overnight cultures were diluted in LB to  
338 an OD<sub>600</sub>=1 and 2 µl of each culture was spotted onto LB agar + 100 µg/ml ampicillin + 50  
339 µg/ml kanamycin + 0.5 mM IPTG + 40 µg/ml X-gal. Plates were incubated at 30°C for 24  
340 hours (BTH101) or 48 hours (DHM1.1).

341 **Bacterial two-hybrid assay utilizing transcription activation.** The transcription activation  
342 based bacterial two-hybrid assay described here is essentially that developed by Dove and  
343 Hochschild.<sup>30</sup> Reporter strain KS1<sup>14</sup> contains a *lacZ* gene on the chromosome with a promoter  
344 that can be activated by interactions between a peptide fused to λcI and a peptide fused to the  
345 α-subunit of RNA polymerase. KS1 cells were transformed with pRA02 and pRA03 or their  
346 derivatives and grown at 37°C on LB agar supplemented with 100 µg/ml ampicillin, 50 µg/ml  
347 kanamycin and 25 µg/ml chloramphenicol. Colonies were picked in triplicate and overnight  
348 cultures were grown at 37°C. These were used to inoculate 10 ml LB + 100 µg/ml ampicillin  
349 + 50 µg/ml kanamycin + 25 µg/ml chloramphenicol + 20 µM IPTG. Cultures were grown at  
350 37°C until they reached an OD<sub>600</sub> ~0.5. β-galactosidase activity of each culture was assayed in  
351 duplicate in 96-well plates after lysis by PopCulture lysis reagent (Novagen) essentially as  
352 described by Thibodeau *et al.*<sup>51</sup> The change in A<sub>405</sub> at 30°C was measured over 30 minutes at  
353 1 minute intervals in a Spectramax plate reader (Molecular Devices) and the rate of change of  
354 the A<sub>405</sub> was normalised by dividing by the OD<sub>600</sub> of the cell culture.

355 **GFP assays.** To monitor repression of transcription TB28 cells (MG1655ΔLacIZYA<sup>52</sup>) were  
356 transformed with pVRbLacUV5 reporter plasmid or its derivatives, and plasmids expressing  
357 Lac repressor or TALE fusion proteins as indicated. Colonies were picked in at least triplicate  
358 and overnight cultures were grown at 37°C in M9 minimal media + 0.25% glycerol + 0.5 mM  
359 CaCl<sub>2</sub> + 2 mM MgSO<sub>4</sub> + 2 µg/ml thiamine + 0.2% casamino acids (+ 50 µg/ml kanamycin +



360 100 µg/ml ampicillin + 25 µg/ml chloramphenicol where required). The overnight cultures  
361 were used to inoculate 10 ml of the same medium and cultures were grown at 37°C until they  
362 reached an OD<sub>600</sub>~0.5. Where indicated arabinose was added to the 10 ml cultures at the  
363 concentrations indicated: where no arabinose was added the fusion protein expression resulted  
364 from basal transcription from the *araBAD* promoter. 5 ml of culture was centrifuged and the  
365 pellet was resuspended in 250 µl PBS (137 mM NaCl, 2.7 mM KCl, 10 mM Na<sub>2</sub>HPO<sub>4</sub>, 2 mM  
366 KH<sub>2</sub>PO<sub>4</sub>). 2 x 100 µl cell suspension from each culture was placed in a black, flat bottomed  
367 96 well plate and the fluorescence read in a FLEXstation plate reader (Molecular Devices).  
368 The excitation wavelength was 470 nm and the emission wavelength was 510 nm with a cut-  
369 off of 495 nm. GFP fluorescence (relative fluorescence units) was normalised by dividing by  
370 the OD<sub>600</sub>.

371

## 372 ACKNOWLEDGEMENTS

373 We thank Luke Cartlidge and George Black for technical assistance with the creation of TAL  
374 constructs and members of the DNA-protein Interactions Unit at the University of Bristol for  
375 helpful discussions. The authors are grateful to the BBSRC and EPSRC for funding through  
376 the BrisSynBio Synthetic Biology Research Centre (BB/L01386X1). D.N.W. holds a Royal  
377 Society Wolfson Research Merit Award (WM140008).

378

## 379 FIGURE LEGENDS

380 **Figure 1.** *De novo* designed PPIs interact *in vivo*. (a) The T25 and T18 domains of *B. pertussis*  
381 adenylate cyclase can be reconstituted in the presence of interacting CC peptides and this  
382 positively regulates expression of β-galactosidase. (b) Fusion proteins used in this assay. The  
383 T25 or T18 subdomains are fused to CCs via a short linker. CCs are labelled as follows: Zip,  
384 leucine zipper of the yeast GCN4 protein; CC-Di, homodimeric coiled coil; CC-Di-A<sup>x</sup> and CC-  
385 Di-B<sup>x</sup>, acidic or basic heterodimeric CCs comprising x heptad repeats. (c) The *cya* *E. coli*  
386 stains DHM1.1 and BTH101 were transformed with pairs of fusion proteins as indicated and  
387 cultures were spotted on LB agar containing X-gal + IPTG. Blue coloration indicates  
388 production of β-galactosidase. The horizontal labels indicate T18-CC-Di-A fusions and the  
389 vertical labels indicate T25-CC-Di-B fusions.

390 **Figure 2.** Activation of gene expression with *de novo* designed PPIs. (a) In this assay one CC  
391 peptide is fused to the  $\lambda$ CI protein and the other is fused to the NTD of the  $\alpha$  subunit of RNAP.  
392 Formation of a CC recruits RNAP to the *lac* promoter which activates transcription of  $\beta$ -  
393 galactosidase. (b & c) Bar charts of  $\beta$ -galactosidase activity of cells expressing fusion proteins  
394 containing different combinations of the 3-, 3.5- and 4-heptad repeat heterodimeric CC  
395 peptides. The acidic coils (CC-Di-A) were fused to the  $\alpha$ -NTD and the basic coils (CC-Di-B)  
396 were fused to  $\lambda$ CI, and *vice versa*.  $\beta$ -galactosidase activity was normalized to the OD<sub>600</sub> of the  
397 bacterial cell culture and is the average of activity from three different cultures shown with  
398 standard error.

399 **Figure 3.** Repression of transcription mediated by interaction of *de novo* designed PPIs. (a)  
400 CC peptides were fused to LacI\*, a dimerization mutant of Lac repressor. If interaction of the  
401 CC peptides occurred LacI\* was able to bind to *lacO1* and repress transcription of GFP. (b)  
402 Bar chart showing repression of GFP activity mediated by the interaction of homodimeric  
403 coiled coil peptides (CC-Di) fused to LacI\*. (c) Bar chart of GFP activity when LacI\* was  
404 fused to either an acidic or basic 3.5 heptad repeat heterodimeric CC peptide (CC-Di-A<sup>3.5</sup> or  
405 CC-Di-B<sup>3.5</sup>) and assayed in the combinations indicated. (d) Bar chart showing repression of  
406 GFP activity of cells expressing LacI\* fusion proteins containing different lengths of the  
407 heterodimeric CC peptides CC-Di-A and CC-Di-B. GFP fluorescence was normalized to the  
408 OD<sub>600</sub> of the cell culture and is an average of three repeats shown with standard error.

409 **Figure 4.** Repression of GFP activity by full-length and truncated TALE proteins. Cells were  
410 transformed with plasmids expressing either a full-length TALE (I), or derivatives lacking the  
411 C-terminal region (II), the N-terminal region (III) or both the N- and C-terminal region (IV).  
412 N: N-terminal region. R: TAL repeat region. C: C-terminal region. Arabinose was added to the  
413 cells at the concentrations indicated in order to induce expression of the TAL protein. GFP  
414 fluorescence was normalized to the OD<sub>600</sub> of the cell culture and is an average of three repeats  
415 shown with standard error.

416 **Figure 5.** Repression of GFP activity by *de novo* homo-dimeric TAL-CC fusion proteins. (a)  
417 CC-Di was fused to TALX which binds the *lacO1* operator. Three GFP reporter plasmids were  
418 used in which there was (i) one *lacO1* site at the promoter, (ii) two *lacO1* sites 92 bp apart, and  
419 (iii) the upstream binding site was changed to the operator sequence *lacO3*. (b) Bar chart  
420 showing GFP activity of cells expressing the GFP reporter plasmid and the repressor construct  
421 indicated. Repression of GFP was enhanced when two binding sites for TALX were present

422 and the repressor protein was able to dimerize via CC-Di. GFP fluorescence was normalized  
423 to the OD<sub>600</sub> of the cell culture and is an average of three repeats shown with standard error.

424 **Figure 6.** Repression of GFP activity by *de novo* heterodimeric TAL-CC fusion proteins. (a)  
425 CC-Di-A<sup>4</sup> was fused to TALY and CC-Di-B<sup>4</sup> was fused to TALX. (i) A GFP reporter plasmid  
426 was used in which there was a TALY binding site at the promoter and a *lacO1* site 92 bp  
427 upstream. (ii) An additional reporter plasmid was used where the upstream binding site was  
428 changed to the *lacO3* sequence. (b) Bar chart of GFP activity of cells transformed with a GFP  
429 reporter plasmid and two additional plasmids expressing the TALX and TALY fusion proteins  
430 as indicated. Repression of GFP was enhanced when binding sites for TALX and TALY were  
431 present and the repressor protein was able to dimerize via CC-Di-A<sup>4</sup>B<sup>4</sup> interactions. GFP  
432 fluorescence was normalized to the OD<sub>600</sub> of the cell culture and is an average of three repeats  
433 shown with standard error.

434

## 435 REFERENCES

- 436 1. Boyle, A. L.; Woolfson, D. N., De novo designed peptides for biological applications.  
437 *Chem Soc Rev* **2011**, *40* (8), 4295-306.
- 438 2. Schreiber, G.; Fleishman, S. J., Computational design of protein-protein interactions.  
439 *Curr Opin Struct Biol* **2013**, *23* (6), 903-10.
- 440 3. Ljubetic, A.; Gradisar, H.; Jerala, R., Advances in design of protein folds and  
441 assemblies. *Curr Opin Chem Biol* **2017**, *40*, 65-71.
- 442 4. Lapenta, F.; Aupic, J.; Strmsek, Z.; Jerala, R., Coiled coil protein origami: from  
443 modular design principles towards biotechnological applications. *Chem Soc Rev* **2018**, *47*  
444 (10), 3530-3542.
- 445 5. Voss, S.; Klewer, L.; Wu, Y. W., Chemically induced dimerization: reversible and  
446 spatiotemporal control of protein function in cells. *Curr Opin Chem Biol* **2015**, *28*, 194-201.
- 447 6. Lee, M. J.; Mantell, J.; Brown, I. R.; Fletcher, J. M.; Verkade, P.; Pickersgill, R.  
448 W.; Woolfson, D. N.; Frank, S.; Warren, M. J., De novo targeting to the cytoplasmic and  
449 luminal side of bacterial microcompartments. *Nat Commun* **2018**, *9* (1), 3413.
- 450 7. Lee, M. J.; Mantell, J.; Hodgson, L.; Alibhai, D.; Fletcher, J. M.; Brown, I. R.;  
451 Frank, S.; Xue, W. F.; Verkade, P.; Woolfson, D. N.; Warren, M. J., Engineered synthetic  
452 scaffolds for organizing proteins within the bacterial cytoplasm. *Nat Chem Biol* **2018**, *14* (2),  
453 142-147.
- 454 8. Pu, J.; Zinkus-Boltz, J.; Dickinson, B. C., Evolution of a split RNA polymerase as a  
455 versatile biosensor platform. *Nat Chem Biol* **2017**, *13* (4), 432-438.
- 456 9. Ptashne, M.; Gann, A., Transcriptional activation by recruitment. *Nature* **1997**, *386*  
457 (6625), 569-77.
- 458 10. Garvie, C. W.; Wolberger, C., Recognition of specific DNA sequences. *Mol Cell*  
459 **2001**, *8* (5), 937-46.
- 460 11. Rojo, F., Mechanisms of transcriptional repression. *Current Opinion in Microbiology*  
461 **2001**, *4* (2), 145-151.
- 462 12. Becker, N. A.; Schwab, T. L.; Clark, K. J.; Maher, L. J., 3rd, Bacterial gene control  
463 by DNA looping using engineered dimeric transcription activator like effector (TALE)  
464 proteins. *Nucleic Acids Res* **2018**, *46* (5), 2690-2696.
- 465 13. Hays, L. B.; Chen, Y. S.; Hu, J. C., Two-hybrid system for characterization of  
466 protein-protein interactions in *E. coli*. *Biotechniques* **2000**, *29* (2), 288-90, 292, 294 passim.
- 467 14. Dove, S. L.; Joung, J. K.; Hochschild, A., Activation of prokaryotic transcription  
468 through arbitrary protein-protein contacts. *Nature* **1997**, *386* (6625), 627-30.
- 469 15. Stynen, B.; Tournu, H.; Tavernier, J.; Van Dijck, P., Diversity in genetic in vivo  
470 methods for protein-protein interaction studies: from the yeast two-hybrid system to the  
471 mammalian split-luciferase system. *Microbiol Mol Biol Rev* **2012**, *76* (2), 331-82.
- 472 16. Hsu, C.; Jaquet, V.; Gencoglu, M.; Becskei, A., Protein Dimerization Generates  
473 Bistability in Positive Feedback Loops. *Cell reports* **2016**, *16* (5), 1204-1210.
- 474 17. Lupas, A. N.; Bassler, J., Coiled Coils - A Model System for the 21st Century. *Trends*  
475 *Biochem Sci* **2017**, *42* (2), 130-140.
- 476 18. Lupas, A. N.; Bassler, J.; Dunin-Horkawicz, S., The Structure and Topology of  
477 alpha-Helical Coiled Coils. *Subcell Biochem* **2017**, *82*, 95-129.
- 478 19. Woolfson, D. N., The design of coiled-coil structures and assemblies. *Adv Protein*  
479 *Chem* **2005**, *70*, 79-112.
- 480 20. Woolfson, D. N., Coiled-Coil Design: Updated and Upgraded. *Subcell Biochem* **2017**,  
481 *82*, 35-61.

- 482 21. Harbury, P. B.; Zhang, T.; Kim, P. S.; Alber, T., A switch between two-, three-, and  
483 four-stranded coiled coils in GCN4 leucine zipper mutants. *Science* **1993**, *262* (5138), 1401-  
484 7.
- 485 22. Woolfson, D. N.; Bartlett, G. J.; Bruning, M.; Thomson, A. R., New currency for old  
486 rope: from coiled-coil assemblies to alpha-helical barrels. *Curr Opin Struct Biol* **2012**, *22* (4),  
487 432-41.
- 488 23. Fletcher, J. M.; Boyle, A. L.; Bruning, M.; Bartlett, G. J.; Vincent, T. L.; Zaccai,  
489 N. R.; Armstrong, C. T.; Bromley, E. H.; Booth, P. J.; Brady, R. L.; Thomson, A. R.;  
490 Woolfson, D. N., A basis set of de novo coiled-coil peptide oligomers for rational protein  
491 design and synthetic biology. *ACS Synth Biol* **2012**, *1* (6), 240-50.
- 492 24. Thomas, F.; Boyle, A. L.; Burton, A. J.; Woolfson, D. N., A Set of de Novo  
493 Designed Parallel Heterodimeric Coiled Coils with Quantified Dissociation Constants in the  
494 Micromolar to Sub-nanomolar Regime. *J Am Chem Soc* **2013**, *135*, 5161-5166.
- 495 25. Thompson, K. E.; Bashor, C. J.; Lim, W. A.; Keating, A. E., SYNZIP Protein  
496 Interaction Toolbox: in Vitro and in Vivo Specifications of Heterospecific Coiled-Coil  
497 Interaction Domains. *ACS Synthetic Biology* **2012**, *1* (4), 118-129.
- 498 26. Negron, C.; Keating, A. E., A set of computationally designed orthogonal antiparallel  
499 homodimers that expands the synthetic coiled-coil toolkit. *J Am Chem Soc* **2014**, *136* (47),  
500 16544-56.
- 501 27. Aronsson, C.; Danmark, S.; Zhou, F.; Oberg, P.; Enander, K.; Su, H.; Aili, D.,  
502 Self-sorting heterodimeric coiled coil peptides with defined and tuneable self-assembly  
503 properties. *Scientific reports* **2015**, *5*, 14063.
- 504 28. Hussey, B. J.; McMillen, D. R., Programmable T7-based synthetic transcription  
505 factors. *Nucleic Acids Res* **2018**, *46* (18), 9842-9854.
- 506 29. Karimova, G.; Pidoux, J.; Ullmann, A.; Ladant, D., A bacterial two-hybrid system  
507 based on a reconstituted signal transduction pathway. *Proc Natl Acad Sci U S A* **1998**, *95*  
508 (10), 5752-6.
- 509 30. Dove, S. L.; Hochschild, A., A bacterial two-hybrid system based on transcription  
510 activation. *Methods Mol Biol* **2004**, *261*, 231-46.
- 511 31. Alberti, S.; Oehler, S.; von Wilcken-Bergmann, B.; Muller-Hill, B., Genetic analysis  
512 of the leucine heptad repeats of Lac repressor: evidence for a 4-helical bundle. *The EMBO*  
513 *journal* **1993**, *12* (8), 3227-36.
- 514 32. Kercher, M. A.; Lu, P.; Lewis, M., Lac repressor-operator complex. *Curr Opin Struct*  
515 *Biol* **1997**, *7* (1), 76-85.
- 516 33. Dong, F.; Spott, S.; Zimmermann, O.; Kisters-Woike, B.; Muller-Hill, B.; Barker,  
517 A., Dimerisation mutants of Lac repressor. I. A monomeric mutant, L251A, that binds Lac  
518 operator DNA as a dimer. *Journal of molecular biology* **1999**, *290* (3), 653-66.
- 519 34. Gaj, T.; Gersbach, C. A.; Barbas, C. F., 3rd, ZFN, TALEN, and CRISPR/Cas-based  
520 methods for genome engineering. *Trends Biotechnol* **2013**, *31* (7), 397-405.
- 521 35. Politz, M. C.; Copeland, M. F.; Pflieger, B. F., Artificial repressors for controlling  
522 gene expression in bacteria. *Chemical Communications* **2013**, *49* (39), 4325-4327.
- 523 36. Richter, A.; Streubel, J.; Boch, J., TAL Effector DNA-Binding Principles and  
524 Specificity. *Methods Mol Biol* **2016**, *1338*, 9-25.
- 525 37. Moore, R.; Chandras, A.; Bleris, L., Transcription Activator-like Effectors: A  
526 Toolkit for Synthetic Biology. *ACS Synthetic Biology* **2014**, *3* (10), 708-716.
- 527 38. Khalil, A. S.; Collins, J. J., Synthetic biology: applications come of age. *Nat Rev*  
528 *Genet* **2010**, *11* (5), 367-79.
- 529 39. Moon, T. S.; Lou, C.; Tamsir, A.; Stanton, B. C.; Voigt, C. A., Genetic programs  
530 constructed from layered logic gates in single cells. *Nature* **2012**.

- 531 40. Gardner, T. S.; Cantor, C. R.; Collins, J. J., Construction of a genetic toggle switch in  
532 *Escherichia coli*. *Nature* **2000**, *403* (6767), 339-42.
- 533 41. Guet, C. C.; Elowitz, M. B.; Hsing, W.; Leibler, S., Combinatorial synthesis of  
534 genetic networks. *Science* **2002**, *296* (5572), 1466-70.
- 535 42. Stanton, B. C.; Nielsen, A. A.; Tamsir, A.; Clancy, K.; Peterson, T.; Voigt, C. A.,  
536 Genomic mining of prokaryotic repressors for orthogonal logic gates. *Nat Chem Biol* **2014**,  
537 *10* (2), 99-105.
- 538 43. Temme, K.; Hill, R.; Segall-Shapiro, T. H.; Moser, F.; Voigt, C. A., Modular  
539 control of multiple pathways using engineered orthogonal T7 polymerases. *Nucleic Acids Res*  
540 **2012**, *40* (17), 8773-81.
- 541 44. Pellizzoni, M. M.; Schwizer, F.; Wood, C. W.; Sabatino, V.; Cotelle, Y.; Matile,  
542 S.; Woolfson, D. N.; Ward, T. R., Chimeric Streptavidins as Host Proteins for Artificial  
543 Metalloenzymes. *ACS Catalysis* **2018**, *8* (2), 1476-1484.
- 544 45. Wood, C. W.; Heal, J. W.; Thomson, A. R.; Bartlett, G. J.; Ibarra, A. A.; Brady, R.  
545 L.; Sessions, R. B.; Woolfson, D. N., ISAMBARD: an open-source computational  
546 environment for biomolecular analysis, modelling and design. *Bioinformatics* **2017**, *33* (19),  
547 3043-3050.
- 548 46. Battesti, A.; Bouveret, E., The bacterial two-hybrid system based on adenylate cyclase  
549 reconstitution in *Escherichia coli*. *Methods* **2012**, *58* (4), 325-34.
- 550 47. Karimova, G.; Ullmann, A.; Ladant, D., Protein-protein interaction between *Bacillus*  
551 *stearothermophilus* tyrosyl-tRNA synthetase subdomains revealed by a bacterial two-hybrid  
552 system. *J Mol Microbiol Biotechnol* **2001**, *3* (1), 73-82.
- 553 48. Manelyte, L.; Guy, C. P.; Smith, R. M.; Dillingham, M. S.; McGlynn, P.; Savery,  
554 N. J., The unstructured C-terminal extension of UvrD interacts with UvrB, but is dispensable  
555 for nucleotide excision repair. *DNA repair* **2009**, *8* (11), 1300-10.
- 556 49. Rhodius, V. A.; Segall-Shapiro, T. H.; Sharon, B. D.; Ghodasara, A.; Orlova, E.;  
557 Tabakh, H.; Burkhardt, D. H.; Clancy, K.; Peterson, T. C.; Gross, C. A.; Voigt, C. A.,  
558 Design of orthogonal genetic switches based on a crosstalk map of sigmas, anti-sigmas, and  
559 promoters. *Mol Syst Biol* **2013**, *9*, 702.
- 560 50. Filonov, G. S.; Piatkevich, K. D.; Ting, L. M.; Zhang, J.; Kim, K.; Verkhusha, V.  
561 V., Bright and stable near-infrared fluorescent protein for in vivo imaging. *Nature*  
562 *biotechnology* **2011**, *29* (8), 757-61.
- 563 51. Thibodeau, S. A.; Fang, R.; Joung, J. K., High-throughput beta-galactosidase assay  
564 for bacterial cell-based reporter systems. *Biotechniques* **2004**, *36* (3), 410-5.
- 565 52. Bernhardt, T. G.; de Boer, P. A., The *Escherichia coli* amidase AmiC is a periplasmic  
566 septal ring component exported via the twin-arginine transport pathway. *Molecular*  
567 *microbiology* **2003**, *48* (5), 1171-82.

568



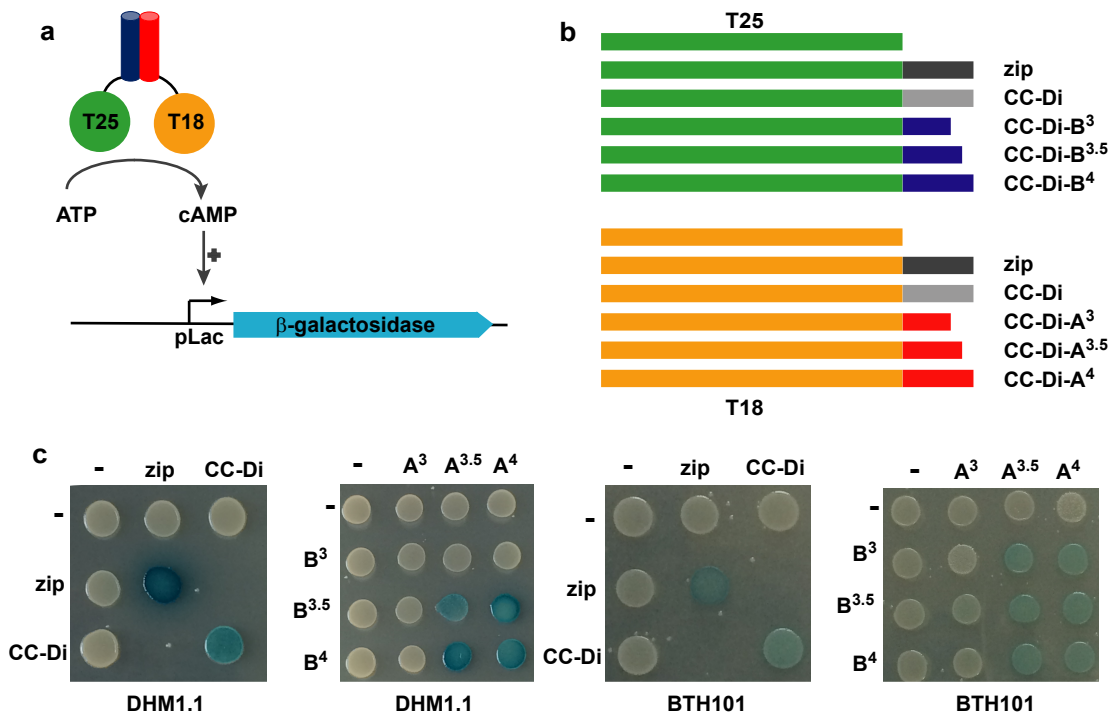

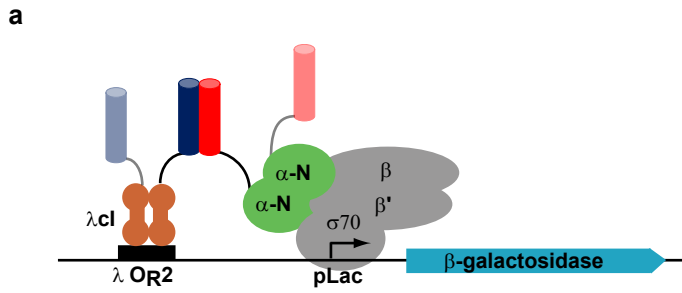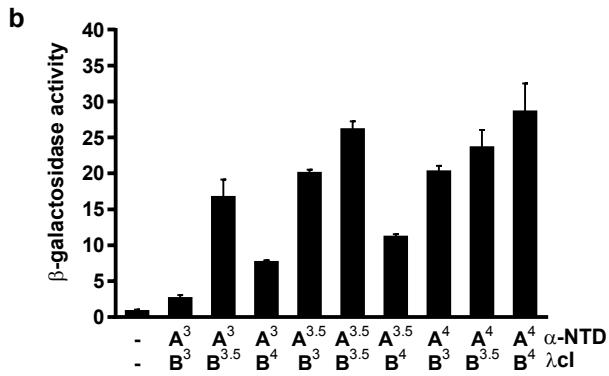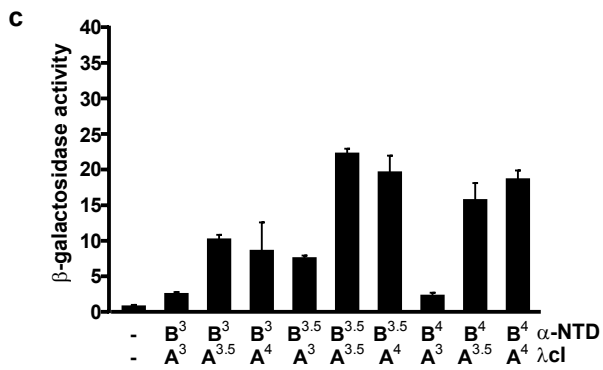

Smith et al., figure 2



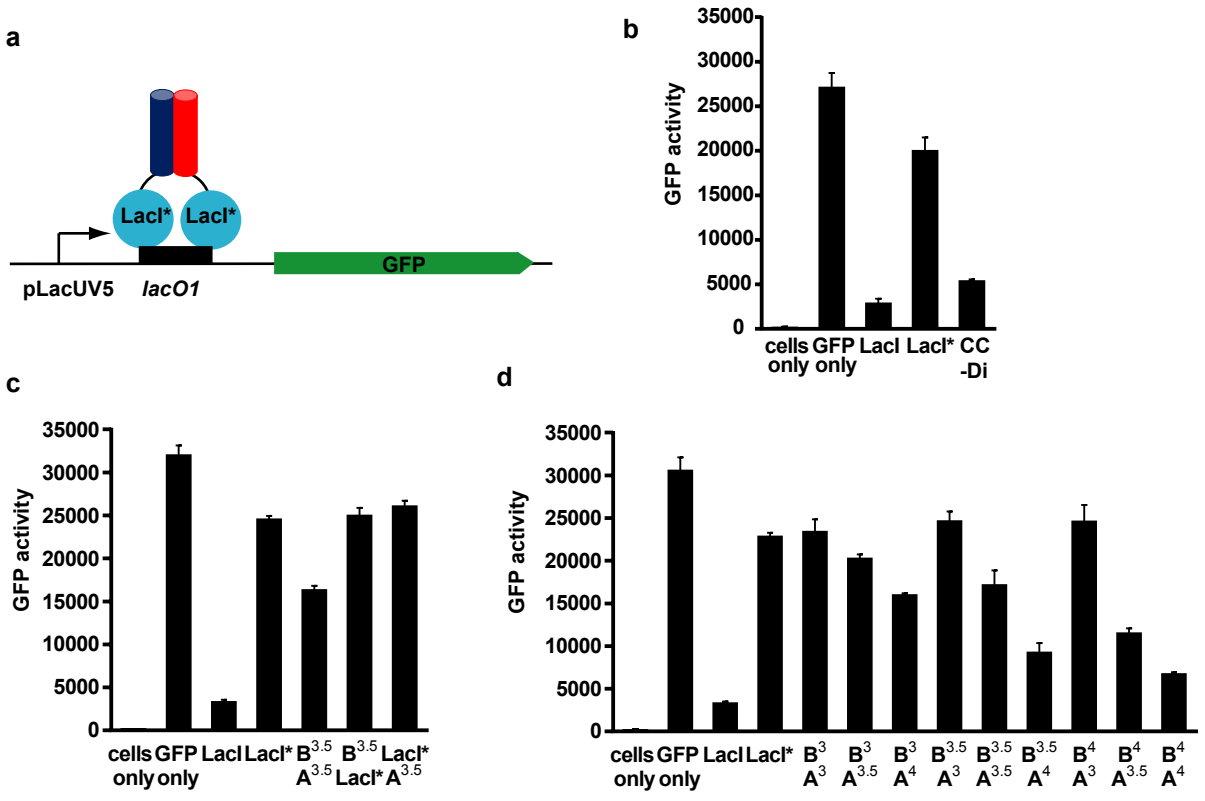

Smith et al., figure 3

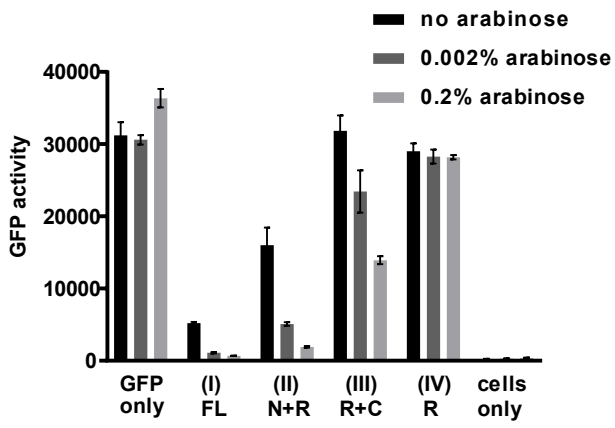

Smith et al., figure 4

**a**  
**(i) *lacO1***

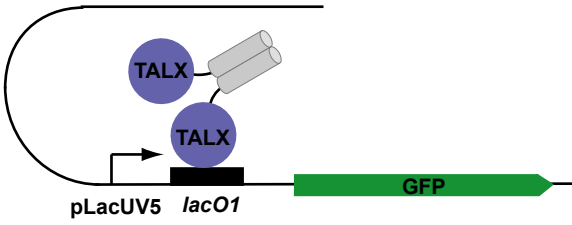

**(ii) *lacO1-lacO1***

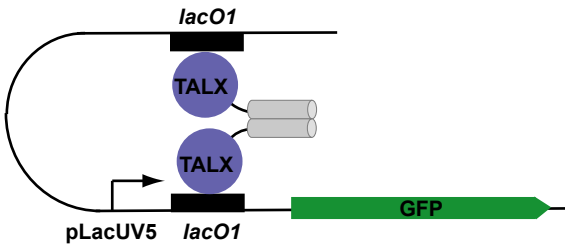

**(iii) *lacO1-lacO3***

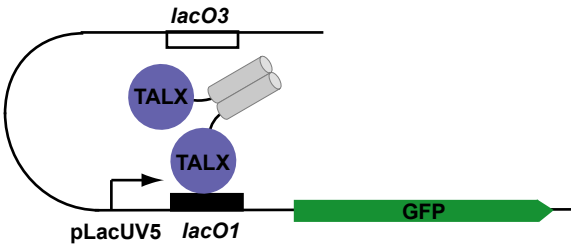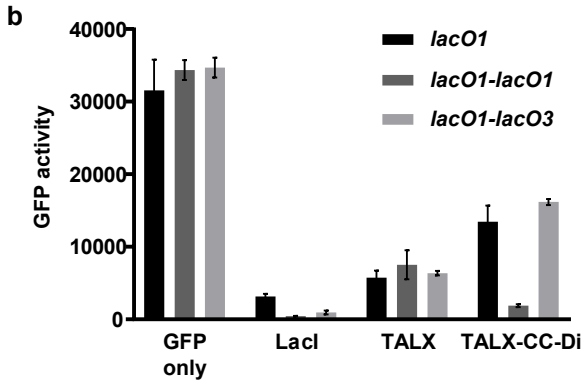

**a**

(i) *TALY-lacO1*

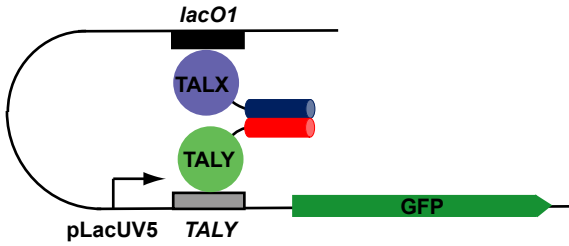

(ii) *TALY-lacO3*

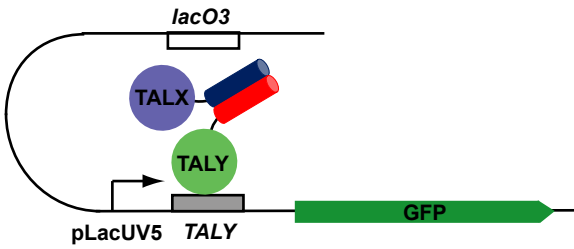

**b**

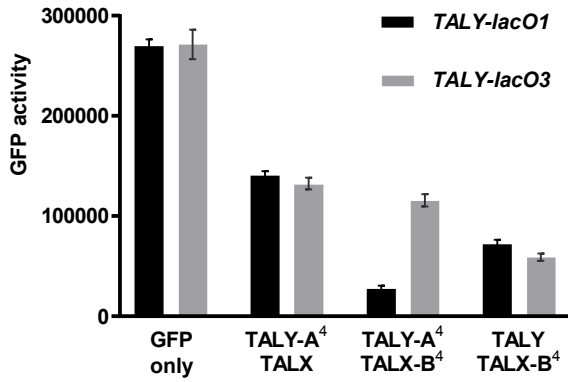

## 1 **Guiding biomolecular interactions in cells using *de novo* protein-protein interfaces**

2  
3 Abigail J. Smith,<sup>1,2</sup> Franziska Thomas<sup>2,†</sup>, Deborah Shoemark<sup>1,2</sup>, Derek N. Woolfson<sup>1,2,3,\*</sup> &  
4 Nigel J. Savery<sup>1,2,\*</sup>

5  
6 <sup>1</sup>School of Biochemistry, University of Bristol, Medical Sciences Building, University Walk, Bristol  
7 BS8 1TD, UK

8 <sup>2</sup>BrisSynBio, University of Bristol, Life Sciences Building, Tyndall Avenue, Bristol BS8  
9 1TQ, UK

10 <sup>3</sup>School of Chemistry, University of Bristol, Cantock's Close, Bristol BS8 1TS, UK

11  
12 † Current address: Institute of Organic and Biomolecular Chemistry, Georg-August-Universität  
13 Göttingen, Tammannstr. 2, 37077 Göttingen, Germany

14 \*To whom correspondence should be addressed: N.J.Savery@bristol.ac.uk;  
15 D.N.Woolfson@bristol.ac.uk

### 16 17 **Plasmid construction**

18 The CC sequences and corresponding DNA sequences used in this work are shown in table S1.  
19 A short linker was encoded upstream of each CC peptide (table S2), and XbaI and Acc65I  
20 restrictions sites at each end facilitated cloning in frame with the C-terminal end of the various  
21 proteins used in this work. The DNA fragments encoding CC-Di-A<sup>3,5</sup>, CC-Di-B<sup>3,5</sup> and CC-Di  
22 were synthesised as GeneStrings (GeneArt, Invitrogen). DNA sequence encoding CC-Di-A<sup>3</sup>,  
23 CC-Di-B<sup>3</sup>, CC-Di-A<sup>4</sup> and CC-Di-B<sup>4</sup> were produced by removing (CC-Di-A<sup>3</sup>, CC-Di-B<sup>3</sup>) or  
24 adding (CC-Di-A<sup>4</sup>, CC-Di-B<sup>4</sup>) sequences from/to expression vectors containing the 3.5 heptad  
25 CC sequences using PCR.

26 Plasmid pKT25 (*kan<sup>R</sup>*) encodes the T25 fragment of *Bordetella pertussis* adenylate cyclase  
27 (CyaA) (amino acids 1-224) and plasmid pUT18c (*amp<sup>R</sup>*) encodes the T18 fragment of CyaA  
28 (amino acids 225-399).<sup>1,2</sup> Both fragments are expressed from the *P<sub>Lac</sub>* promoter. The synthetic  
29 DNA fragments encoding the CC peptides were cloned in frame downstream of the T25 or T18  
30 subdomains at XbaI/Acc65I sites to make pKT25-CC-Di, pUT18c-CC-Di, pKT25-B<sup>3,5</sup> and  
31 pUT18c-A<sup>3,5</sup>. Plasmids pKT25-zip and pUT18c-zip encode the T25 and T18 fragments fused  
32 to the yeast GCN4 leucine zipper.<sup>2</sup>

33 For the transcription-activation based bacterial two-hybrid assay the DNA fragments encoding  
34 the CC peptides were cloned into either pRA02 (*amp<sup>R</sup>*), which encodes fusions with the  $\alpha$ -  
35 subunit of RNA polymerase (amino acids 1-248), or pRA03 (*cm<sup>R</sup>*) which encodes fusions with  
36 the  $\lambda$ cI protein (amino acids 1-236)<sup>3</sup>. DNA fragments encoding the CC peptides CC-Di-A<sup>3,5</sup>,  
37 CC-Di-B<sup>3,5</sup> and CC-Di were inserted into the XbaI/Acc65I sites of both pRA02 and pRA03  
38 allowing in-frame fusions with the  $\alpha$ -subunit or  $\lambda$ cI.

39 Plasmid pBADLacI (*amp<sup>R</sup>*) was made as follows: DNA encoding WT Lac repressor protein  
40 (LacI) was amplified by PCR from pET21a (Novagen) and was cloned into pBADHis-B-iRFP  
41 (a gift from Vladislav Verkhusha, Addgene plasmid #31855<sup>4</sup>) at BglII/HindIII sites.  
42 pBADLacI allows expression of LacI from the arabinose inducible P<sub>BAD</sub> promoter, giving an  
43 N-terminal 6xHis tag and Xpress<sup>TM</sup> epitope tag. Plasmid pBADLacI\* encodes a truncated LacI  
44 gene (aa 1-331) containing an L251A substitution which was introduced by site-directed  
45 mutagenesis. XbaI and Acc65I sites were introduced downstream of the truncated LacI gene,  
46 allowing DNA encoding CC-Di and CC-Di-B peptides to be cloned in frame at the C terminus  
47 of LacI\*. In order to express heterodimeric LacI-CC peptide fusion proteins an additional set  
48 of *cm<sup>R</sup>* plasmids were made containing a different origin of replication. The *lacI\** gene, P<sub>BAD</sub>  
49 promoter and *araC* gene were excised from pBADLacI\* at BsaI/NsiI restriction sites and  
50 cloned into pVRc20\_992 (a gift from Christopher Voigt, Addgene #49739<sup>5</sup>) to produce  
51 pVRcLacI\*. DNA fragments encoding CC-Di-A peptides were cloned into pVRcLacI\* at  
52 XbaI/Acc65I sites. The p15A *ori* in pVRcLacI\* has a lower copy number than the pBR322 *ori*  
53 in pBADLacI\* which lacks the *rop* gene<sup>6</sup> so the expression levels of LacI\*-CC-Di-A and  
54 LacI\*-CC-Di-B are expected to vary slightly.

55 TALE DNA binding domain arrays were constructed using the Joung lab REAL assembly  
56 TALEN kit, a gift from Keith Joung (Addgene kit # 1000000017<sup>7</sup>). This kit allows the  
57 production of DNA fragments encoding TALE repeat arrays using sequential restriction  
58 enzyme digestion and ligation. The DNA binding sites of the TALEs used in this work are  
59 shown in table S3. pBAD-His-JDS78 (*amp<sup>R</sup>*) contains the N- and C-terminal domains of the  
60 TALE and also the 0.5 TAL repeat which is at the C-terminal end of the TALE repeat array,  
61 and was made by PCR amplification of a DNA fragment encoding the TALE N and C terminus  
62 and the T 0.5 repeat from the plasmid JDS78 (from Addgene kit # 1000000017). This fragment  
63 was cloned into the BglII /HindIII sites of a pBAD-His-iRFP derivative in which the BsmBI  
64 site was mutated, creating pBAD-His-JDS78. Sequence encoding a TAL repeat array  
65 recognising 16 bp of the *lacOI* sequence constructed by REAL assembly (TALA) was inserted

66 into pBAD-His-JDS78 at the BsmBI site to create pBADTALA (Construct I; TALA aa 1-763).  
67 In order to examine the minimal TAL domains required for DNA binding the TALA repeat  
68 array (R) was also inserted into the vectors pBAD-His-JDS78 $\Delta$ NTD (Construct II; TALA aa  
69 129-763), pBAD-His-JDS78 $\Delta$ CTD (Construct III; TALA aa 1-707) and pBAD-His-  
70 JDS78 $\Delta$ NTD+CTD (Construct IV; TALA aa 129-707). These contained different  
71 combinations of the TALE *N*- and *C*-terminal regions and were created by PCR amplification  
72 from JDS78 and insertion into pBAD-His-RFP.

73 Plasmid pBAD-His-JDS78XA contains the *N*-terminal domain of the TALE and the T 0.5  
74 repeat (but not the *C*-terminal domain) and was constructed by PCR using primers that added  
75 an XbaI site and Acc65I site downstream of the 0.5 TAL repeat. A sequence encoding a TAL  
76 repeat array recognising 17 bp of the *lacO1* sequence (TALX) was inserted into pBAD-His-  
77 JDS78XA to create pBADTALX, and then sequences encoding the CC peptides CC-Di and  
78 CC-Di-B were cloned in frame with at the *C*-terminal end to produce pBADTALX-CC-Di and  
79 pBADTALX-CC-Di-B. To express heterodimeric TAL-CC peptide fusion proteins an  
80 additional set of plasmids with an alternative *ori* and marker were constructed. A BsaI/NsiI  
81 fragment from pBAD-His-JDS78XA containing the *araC* gene and the expression cassette  
82 encoding the *N*-terminal domain of the TALE and the T 0.5 repeat was inserted into  
83 pVRc20\_992 to produce pVRcJDS78XA. A sequence encoding a TAL repeat array  
84 recognising 16 bp of non-*lacO* sequence (TALY) was inserted into pVRcJDS78XA as above  
85 to create pVRcTALY. DNA fragments encoding CC-Di-A peptides were inserted at  
86 XbaI/Acc65I sites to produce pVRcTALY-CC-Di-A.

87 The reporter plasmid pVRbLacUV5 (*kan<sup>R</sup>*) allows the expression of sfGFP from the *lacUV5*  
88 promoter and is derived from the plasmid pVRb20\_992 (a gift from Christopher Voigt,  
89 Addgene plasmid # 49714<sup>5</sup>). DNA containing the *lacUV5* promoter minus the CRP half site  
90 (-53/+40) was amplified from the plasmid pSRLacUV5<sup>8</sup> by PCR and was cloned into  
91 pVRb20\_992 at BspHI and BamHI sites. For experiments analysing repression by TAL-CC  
92 fusion proteins the following reporter plasmids were created by modifying pVRbLacUV5:  
93 pVRblacO1-*lacO1*, pVRblacO1-*lacO3*, pVRbTALY-*lacO1*, pVRbTALY-*lacO3*. Details of  
94 the promoter region of these reporter constructs is shown in table S4. Synthetic DNA  
95 fragments carrying the promoters containing binding sites for TALX (*lacO1*) and TALY, and  
96 the *lacO3* operator sequence were inserted into pVRbLacUV5 at EcoRI/HindIII sites. The  
97 spacing between the operator sequences is identical to the wild type *lac* promoter (92 bp).

## 98 **Western blotting**

99 To detect expression of coiled coil peptide fusion proteins, bacterial cultures were lysed in  
100 SDS-loading buffer (100 mM Tris-Cl pH 6.8, 4% (w/v) SDS, 0.2 % (w/v) bromophenol blue  
101 20% (v/v) glycerol, 200 mM DTT) and run on an SDS–polyacrylamide gel of an appropriate  
102 percentage. Protein was transferred onto an immobilonP PVDF membrane (Millipore).  
103 Membranes were probed with polyclonal anti- $\alpha$  subunit antibodies (a gift from A. Ishihama),  
104 anti- $\lambda$ CI antibodies (a gift from A. Hochschild) or a monoclonal antibody against the His-tag  
105 (BD-biosciences #631212) using standard western blotting techniques. Detection was carried  
106 out using the POD chemiluminescence system (Roche).



| Construct              | Protein and DNA sequence                                                                                                                                |
|------------------------|---------------------------------------------------------------------------------------------------------------------------------------------------------|
| CC-Di-A <sup>3</sup>   | E I A A L E K E N A A L E W E I A A L E Q G<br>gaaattgctgctgctggagaaggagaatgcagccttggaaatgggaaattgccgcactggaacagggg                                     |
| CC-Di-A <sup>3.5</sup> | L E Q E I A A L E K E N A A L E W E I A A L E Q G<br>ctcgaacaggaaattgctgctgctggagaaggagaatgcagccttggaaatgggaaattgccgcactggaacagggg                      |
| CC-Di-A <sup>4</sup>   | E I A A L E Q E I A A L E K E N A A L E W E I A A L E Q G<br>gaaatcgctgctgctcgaacaggaaattgctgctgctggagaaggagaatgcagccttggaaatgggaaattgccgcactggaacagggg |
| CC-Di-B <sup>3</sup>   | K I A A L K Y K N A A L K K K I A A L K Q G<br>aagatcgccgcactgaaatacaagaatgcggccctgaaaaagaagatcgcggcactgaaacagggg                                       |
| CC-Di-B <sup>3.5</sup> | L K Q K I A A L K Y K N A A L K K K I A A L K Q G<br>ctgaaacagaagatcgccgcactgaaatacaagaatgcggccctgaaaaagaagatcgcggcactgaaacagggg                        |
| CC-Di-B <sup>4</sup>   | K I A A L K Q K I A A L K Y K N A A L K K K I A A L K Q G<br>aagattgctgctgctgaaacagaagatcgccgcactgaaatacaagaatgcggccctgaaaaagaagatcgcggcactgaaacagggg   |
| CC-Di                  | E I A A L K Q E I A A L K K E N A A L K W E I A A L K Q G<br>gaaattgctgctgctgaaacaggaaatcgctgccctgaaaaagagaatgccgctctgaaatgggaaatcgcagcgtgaaacaaggt     |

109 **Table S1:** The amino acid sequences of the CC peptides used in this work<sup>9,10</sup>. Below is the DNA sequence which was designed using codons  
110 selected for expression in *E. coli*.

112

| Construct                                             | Linker Sequence |
|-------------------------------------------------------|-----------------|
| pKT25-CC-Di-B <sup>†</sup>                            | AGSTGSESG       |
| pUT18c-CC-Di-A <sup>†</sup>                           | SGGSTGSGGSG     |
| pKT25-CC-Di                                           | AGSTLEGSG       |
| pUT18c-CC-Di                                          | HCRSTLEGSG      |
| pRA02-CC-Di-A, pRA02-CC-Di-B, pRA02-CC-Di             | ALEGSG          |
| pRA03-CC-Di-A, pRA03-CC-Di-B, pRA03-CC-Di             | AALEGSG         |
| pBADLacI*-CC-Di, pBADLacI*-CC-Di-B, pVRcLacI*-CC-Di-A | APGLEGSG        |
| pBADTALX-CC-Di, pBADTALX-CC-Di-B, pVRcTALY-CC-Di-A    | SIVAQLSGLEGSG   |

113

114 **Table S2:** Plasmids used in this study and the linker sequences between the protein domains and the C-terminal CC peptides. <sup>†</sup>These linker  
115 sequences were optimised by molecular dynamics modelling to allow optimal positioning of the CC and modified from the original sequence using  
116 site-directed mutagenesis.

117

118

119

120

| <b>TALE protein</b> | <b>DNA sequence of binding site</b> |
|---------------------|-------------------------------------|
| TALA                | <b>TT</b> GTGAGCGGATAACAAt          |
| TALX                | <b>TT</b> GTGAGCGGATAACAATt         |
| TALY                | <b>T</b> GATATGGAACAAAGCGt          |

121

122 **Table S3:** DNA Binding sites for the TALE proteins used in this work. The first T in bold is not bound by the TAL repeat array but is a requirement  
123 for TALE binding. The lowercase t is recognised by the 0.5 TAL repeat present at the C-terminal end of each array.

124

| Construct       | Promoter Sequence                                                                                                                                                                                                                 |
|-----------------|-----------------------------------------------------------------------------------------------------------------------------------------------------------------------------------------------------------------------------------|
| pVRbLacUV5      | <u>gaattc</u> cattaggcaccccaggc <i>ttacactttatgcttccggctcgtataatgtgtggaattgtgagcggataacaatt</i> tcacacaggaaacagcttgcgcaagc <u>tt</u>                                                                                              |
| pVRblacO1-lacO1 | <u>gaattc</u> cgattcattaatgcagctggcacgacaggttcccgactggaaagcgaatt <b>gtgagcggataacaatt</b> aatgatcgtaatggactcattaggcaccccaggc <i>ttacactttatgcttccggctcgtataatgtgtggaattgtgagcggataacaatt</i> tcacacaggaaacagcttgcgcaagc <u>tt</u> |
| pVRblacO1-lacO3 | <u>gaattc</u> cgattcattaatgcagctggcacgacaggttcccgactggaaagc <b>ggcagtgagcgaacgcaatt</b> aatgatcgtaatggactcattaggcaccccaggc <i>ttacactttatgcttccggctcgtataatgtgtggaattgtgagcggataacaatt</i> tcacacaggaaacagcttgcgcaagc <u>tt</u>   |
| pVRbTALY-lacO1  | <u>gaattc</u> cgattcattaatgcagctggcacgacaggttcccgactggaaagcgaatt <b>gtgagcggataacaatt</b> aatgatcgtaatggactcattaggcaccccaggc <i>ttacactttatgcttccggctcgtataatgtgtggaatgatatggaacaaagcgt</i> tcacacaggaaacagcttgcgcaagc <u>tt</u>  |
| pVRbTALY-lacO3  | <u>gaattc</u> cgattcattaatgcagctggcacgacaggttcccgactggaaagc <b>ggcagtgagcgaacgcaatt</b> aatgatcgtaatggactcattaggcaccccaggc <i>ttacactttatgcttccggctcgtataatgtgtggaatgatatggaacaaagcgt</i> tcacacaggaaacagcttgcgcaagc <u>tt</u>    |

127 **Table S4:** DNA sequences of the promoter regions of sfGFP reporter constructs. EcoRI and HindIII restriction sites are underlined. -35 and -10  
128 sequences of the LacUV5 promoter are in italics. The TALX binding site (*lacO1*) is in bold, TALY is in bold and underlined and *lacO3* is in bold  
129 and italics.

130 **Supplementary figure S1.** (a) Bar chart showing  $\beta$ -galactosidase activity of cells expressing  
131 fusion proteins containing CC-Di. Transcription activation is not observed with the  
132 homodimeric CC-Di. (b) Bar chart showing  $\beta$ -galactosidase activity of cells expressing fusion  
133 proteins containing CC-Di-A<sup>3.5</sup> and CC-Di-B<sup>3.5</sup>. Transcription activation only occurs when  
134 both peptides of the CC are present.  $\beta$ -galactosidase activity was normalised to the OD<sub>600</sub> of  
135 the bacterial cell culture and is the average of activity from three different cultures shown with  
136 standard error of the mean. (c & d) Western blots showing expression of fusion proteins in the  
137 assays shown in a & b. Blots were probed with an antibody against the  $\alpha$ -subunit of RNAP (\*  
138 indicates the cellular  $\alpha$ -subunit which is also recognised by the antibody) and an antibody  
139 against the  $\lambda$ CI protein († shows the  $\lambda$ CI fusion protein, the other bands are likely to be non-  
140 specific products). (c) Blot showing expression of fusion proteins from cultures assayed in (a).  
141 Lanes 1-3 are three separate cultures expressing  $\alpha$ -NTD of RNAP and  $\lambda$ CI protein alone.  
142 Lanes 4-6 are three separate cultures expressing  $\alpha$ -NTD-CC-Di and  $\lambda$ CI-CC-Di fusions. (d)  
143 Blot showing expression of fusion proteins from cultures assayed in (b). Each lane of the gel  
144 is cell lysate from one of the three cultures assayed. CC-A<sup>3.5</sup> and CC-B<sup>3.5</sup> were fused to the  $\alpha$ -  
145 NTD and to  $\lambda$ CI in different combinations as indicated.

146 **Supplementary figure S2.** Control for the experiments in figure 6, repression of GFP activity  
147 by *de novo* heterodimeric TAL-CC fusion proteins. Bar chart showing GFP activity of cells  
148 transformed with GFP reporter plasmids and with a plasmid expressing single TALX or TALY  
149 fusion proteins as indicated. Where shown CC-Di-A<sup>4</sup> was fused to TALY protein and CC-Di-  
150 B<sup>4</sup> was fused to TALX protein. GFP fluorescence was normalised to the OD<sub>600</sub> of the cell  
151 culture and is an average of three repeats shown with standard error.

## 152 **References**

- 153 1. Battesti, A.; Bouveret, E., The bacterial two-hybrid system based on adenylate cyclase  
154 reconstitution in *Escherichia coli*. *Methods* **2012**, *58* (4), 325-34.
- 155 2. Karimova, G.; Ullmann, A.; Ladant, D., Protein-protein interaction between *Bacillus*  
156 *stearothermophilus* tyrosyl-tRNA synthetase subdomains revealed by a bacterial two-hybrid  
157 system. *J Mol Microbiol Biotechnol* **2001**, *3* (1), 73-82.
- 158 3. Manelyte, L.; Guy, C. P.; Smith, R. M.; Dillingham, M. S.; McGlynn, P.; Savery,  
159 N. J., The unstructured C-terminal extension of UvrD interacts with UvrB, but is dispensable  
160 for nucleotide excision repair. *DNA repair* **2009**, *8* (11), 1300-10.
- 161 4. Filonov, G. S.; Piatkevich, K. D.; Ting, L. M.; Zhang, J.; Kim, K.; Verkhusa, V.  
162 V., Bright and stable near-infrared fluorescent protein for in vivo imaging. *Nature*  
163 *biotechnology* **2011**, *29* (8), 757-61.
- 164 5. Rhodius, V. A.; Segall-Shapiro, T. H.; Sharon, B. D.; Ghodasara, A.; Orlova, E.;  
165 Tabakh, H.; Burkhardt, D. H.; Clancy, K.; Peterson, T. C.; Gross, C. A.; Voigt, C. A.,

- 166 Design of orthogonal genetic switches based on a crosstalk map of sigmas, anti-sigmas, and  
167 promoters. *Mol Syst Biol* **2013**, *9*, 702.
- 168 6. Cronan, J. E., A family of arabinose-inducible Escherichia coli expression vectors  
169 having pBR322 copy control. *Plasmid* **2006**, *55* (2), 152-157.
- 170 7. Sander, J. D.; Cade, L.; Khayter, C.; Reyon, D.; Peterson, R. T.; Joung, J. K.; Yeh,  
171 J. R., Targeted gene disruption in somatic zebrafish cells using engineered TALENs. *Nature*  
172 *biotechnology* **2011**, *29* (8), 697-8.
- 173 8. Savery, N. J.; Lloyd, G. S.; Kainz, M.; Gaal, T.; Ross, W.; Ebright, R. H.; Gourse,  
174 R. L.; Busby, S. J., Transcription activation at Class II CRP-dependent promoters:  
175 identification of determinants in the C-terminal domain of the RNA polymerase alpha  
176 subunit. *EMBO J* **1998**, *17* (12), 3439-47.
- 177 9. Fletcher, J. M.; Boyle, A. L.; Bruning, M.; Bartlett, G. J.; Vincent, T. L.; Zaccai,  
178 N. R.; Armstrong, C. T.; Bromley, E. H.; Booth, P. J.; Brady, R. L.; Thomson, A. R.;  
179 Woolfson, D. N., A basis set of de novo coiled-coil peptide oligomers for rational protein  
180 design and synthetic biology. *ACS Synth Biol* **2012**, *1* (6), 240-50.
- 181 10. Thomas, F.; Boyle, A. L.; Burton, A. J.; Woolfson, D. N., A set of de novo designed  
182 parallel heterodimeric coiled coils with quantified dissociation constants in the micromolar to  
183 sub-nanomolar regime. *Journal of the American Chemical Society* **2013**, *135* (13), 5161-6.

184

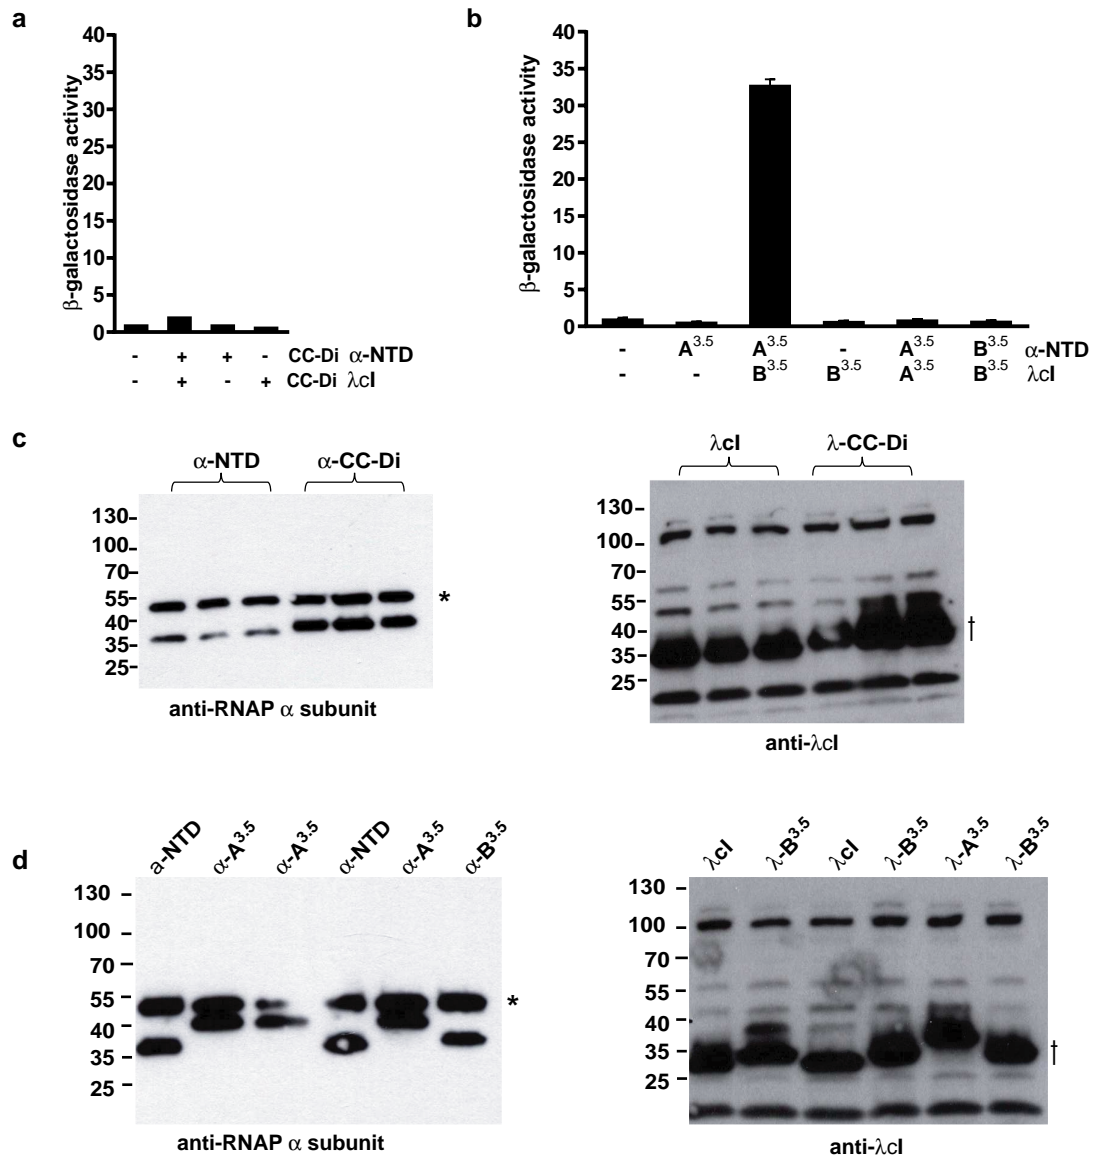

Smith et al., supplementary figure S1

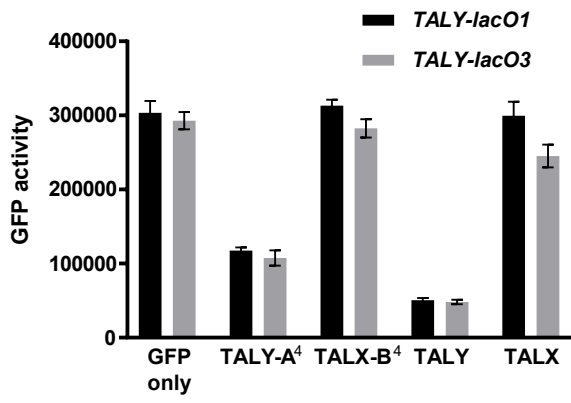

Smith et al., supplementary figure S2
